## Addendum

## Addendum: Importance of carbohydrate antigen (CA 19-9) and carcinoembryonic antigen (CEA) in the prognosis of patients with duodenal adenocarcinoma: a retrospective single-institution cohort study

Ellery Altshuler<sup>1</sup>, Raymond Richhart<sup>1</sup>, William King<sup>1</sup>, Mahmoud Aryan<sup>2</sup>, Akash Mathavan<sup>3</sup>, Akshay Mathavan<sup>3</sup>, Keegan Hones<sup>3</sup>, Daniel F. Leach III<sup>3,7</sup>, Logan Pucci<sup>1</sup>, Joshua Riklan<sup>1</sup>, Pat Haley<sup>1</sup>, Ilyas Sahin<sup>4,5</sup>, Brian Ramnarain<sup>4,5</sup>, Sherise Rogers<sup>4,5</sup>, Ibrahim Nassour<sup>6</sup>, Steven Hughes<sup>6</sup>, Thomas J. George<sup>4,5</sup> and Jesus Fabregas<sup>4,5</sup>

<sup>1</sup>Department of Internal Medicine, University of Florida, Gainesville, FL 32610, USA

<sup>2</sup>Department of Internal Medicine, University of Alabama at Birmingham, Birmingham, AL 35294, USA

<sup>3</sup>University of Florida College of Medicine, Gainesville, FL 32610, USA

<sup>4</sup>Division of Hematology and Oncology, Department of Medicine, University of Florida, Gainesville, FL 32610, USA

<sup>5</sup>University of Florida Health Cancer Center, Gainesville, FL 32610, USA

<sup>6</sup>Division of Surgical Oncology, Department of Surgery, University of Florida, Gainesville, FL 32610, USA

<sup>7</sup>Department of Radiation Oncology, University of Florida Health, Gainesville, FL 32601, USA

**Published:** December 12, 2023

**Copyright:** © 2023 Altshuler et al. This is an open access article distributed under the terms of the [Creative Commons Attribution License](#) (CC BY 4.0), which permits unrestricted use, distribution, and reproduction in any medium, provided the original author and source are credited.

**This article has an addendum:** No funding was used for this publication.

Original article: Oncotarget. 2023; 14:351–357. <https://doi.org/10.18632/oncotarget.28406>
